# Supplementary figures and images for: A pH, glucose, and dopamine triple-responsive, self-healable adhesive hydrogel formed by phenylborate–catechol complexation
Source: Royal Society of Chemistry journal article supplement (doi:10.1039/c7py00519a), 2017-01-01

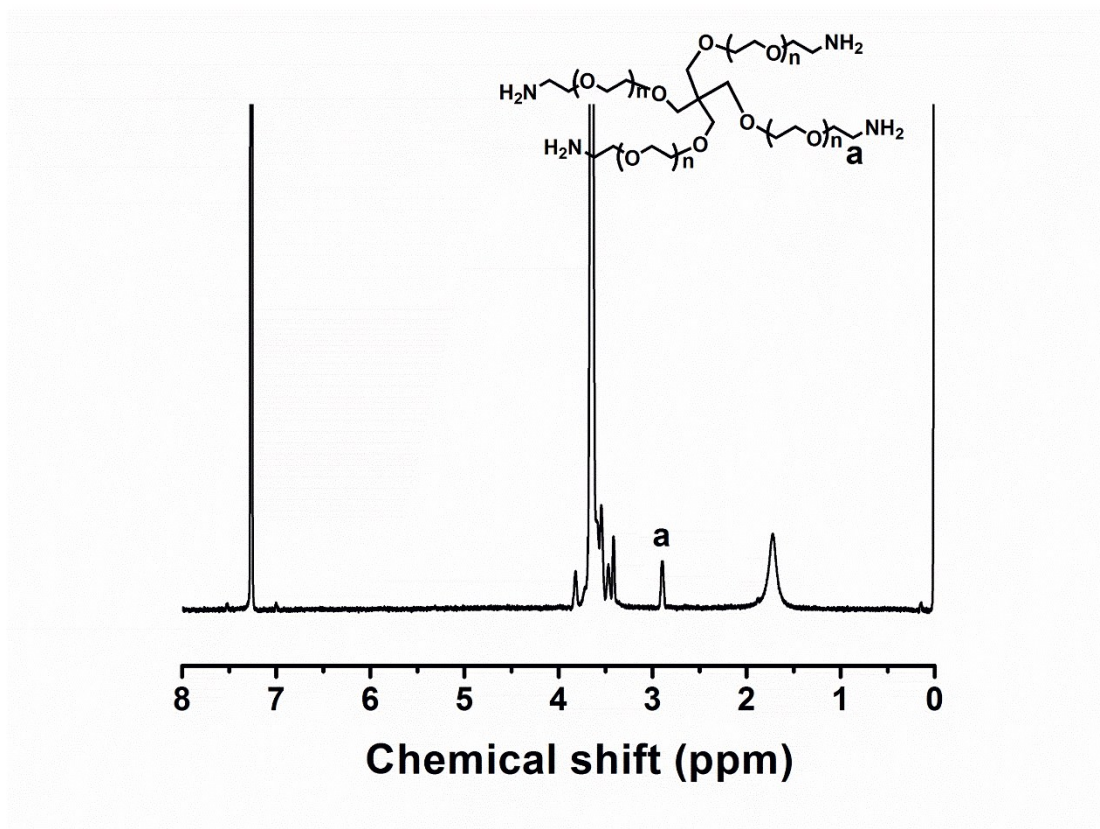

**Figure S1** The  $^1\text{H-NMR}$  spectrum of 4-arm-PEG-NH<sub>2</sub> in CDCl<sub>3</sub>.

Supplement: c7py00519a1.pdf [file c7py00519a1.pdf]
